# Supplementary material for: A scalable in situ surfactant-free synthesis of a uniform MnO/graphene composite for highly reversible lithium storage
Source: Royal Society of Chemistry journal article supplement (doi:10.1039/c6dt03804b), 2016-01-01
Supplement: c6dt03804b1.pdf [file c6dt03804b1.pdf]

## **A scalable in-situ surfactant-free synthesis of uniform MnO/graphene composite for highly reversible lithium storage**

**Wenlong Cai<sup>b</sup>, Gaoran Li<sup>c</sup>, Kailong Zhang<sup>b</sup>, Jianbin Zhou<sup>b</sup>, Yitai Qian<sup>b</sup>, Jin Du<sup>a\*</sup>**

- a. *Graduate school and Hefei National Laboratory for Physical Science at Microscale, University of Science and Technology of China, Hefei, 230026, P.R. China.  
Tel: +86-551-63602922; E-mail: dujindj@ustc.edu.cn;*
- b. *Hefei National Laboratory for Physical Science at Microscale and Department of Chemistry, University of Science and Technology of China, Hefei, 230026, P.R. China.*
- c. *Department of Chemical Engineering, Waterloo Institute for Nanotechnology, University of Waterloo, 200 University Avenue West, Waterloo, Ontario, N2L 3G1, Canada*

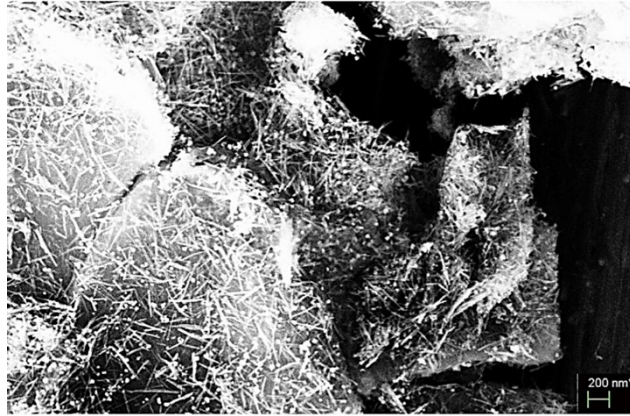

Figure S1. SEM image of the Mn<sub>3</sub>O<sub>4</sub>/graphene oxide

The uniform Mn<sub>3</sub>O<sub>4</sub> nanowire were uniformly adhered on the surface of grapheme oxide and no big agglomeration. After calcining, it transformed to spherical MnO.

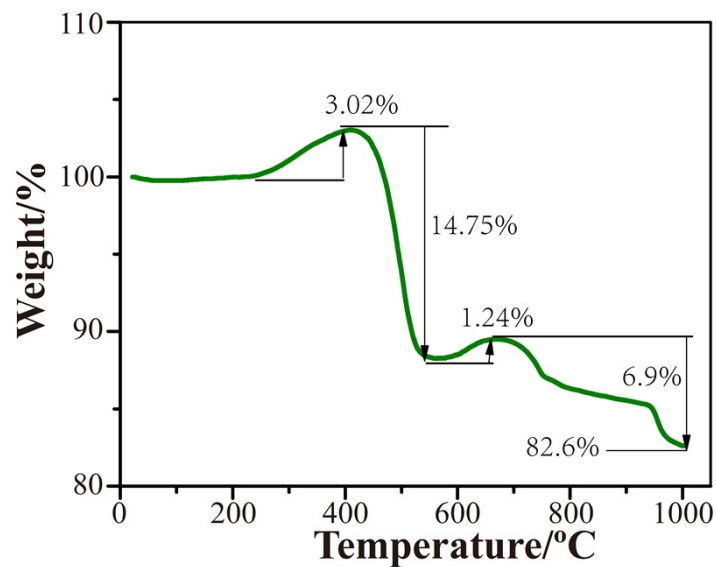

Figure S2. TG curve of the MnO/grapheme composite.

The weight change between 200 to 1000 °C is owing to both the oxidation of MnO and the combustion of reduced grapheme. Among this temperature range, in addition to  $C + O_2 = CO_2$ , a reaction also occurs from the reference we learn it as :  $MnO + O_2 = Mn_2O_3$ . [ B. Liu, X. Hu, H. Xu, W. Luo, Y. Sun, Y. Huang, Sci. rep., 2014, 4: 4229.] Based on the theoretical value (11.3 wt. %) of the weight increase from MnO to Mn<sub>2</sub>O<sub>3</sub>, the content of the MnO in the product is evaluated to be about 74.2 wt. %.

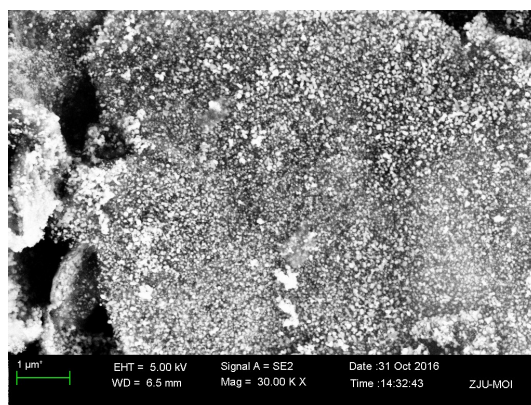

Figure S3. The SEM image of the MnO/graphene composite.

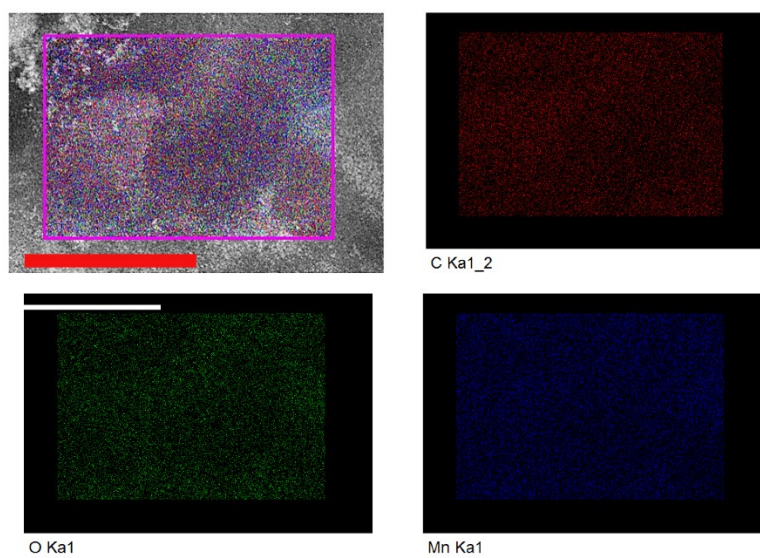

Figure S4. The SEM image and the corresponding element mapping. Scar bar 5 μm.

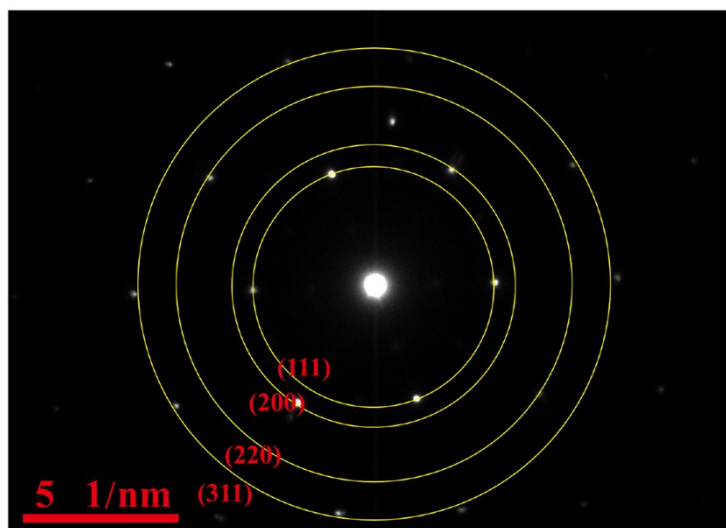

Figure S5. The SAED pattern of MnO in the MnO/graphene hybrid material.

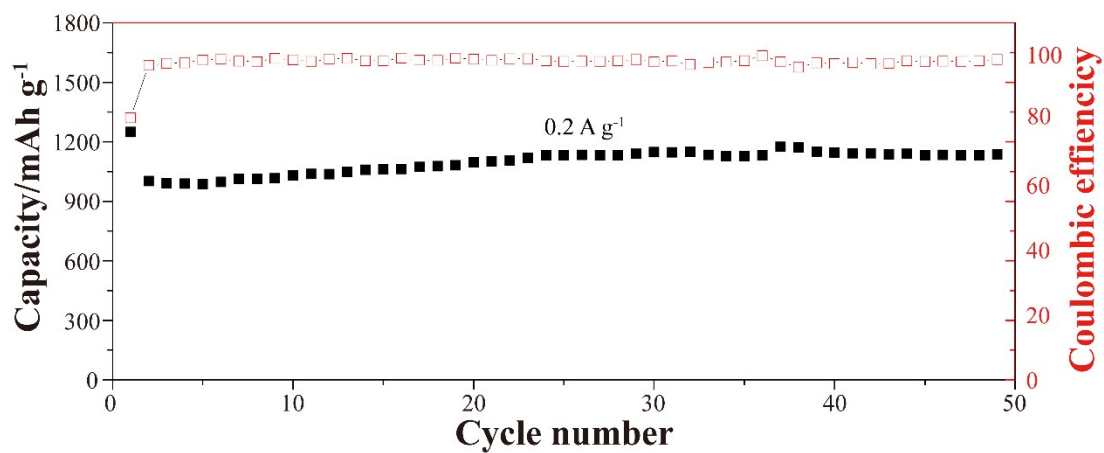

Figure S6. Cycling performance of MnO/graphene electrode at a current density of 0.2 A g<sup>-1</sup> during the first 50 cycles.

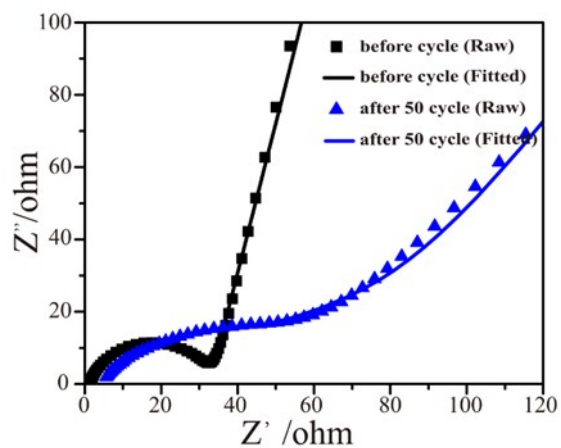

Figure S7. Nyquist plots of MnO/graphene electrode before cycling and charge state after 50 cycles at  $0.2 \text{ A g}^{-1}$ , and the corresponding simulation results.

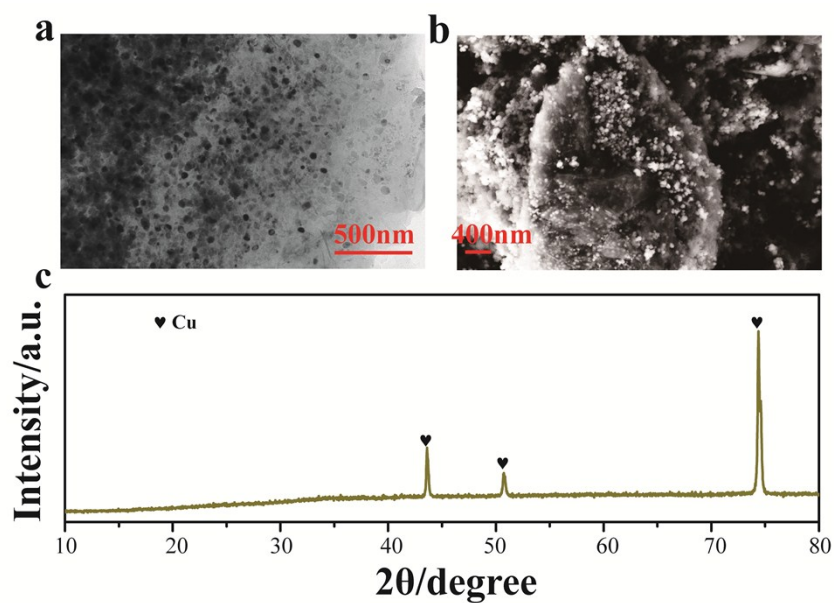

Figure S8. (a) TEM image, (b) SEM image and (c) XRD pattern of the MnO/grapheme composite charged to 3V after 50 cycles at a current density of  $2 \text{ A g}^{-1}$ .
